# Supplementary material for: Detection of VAMP Proteolysis by Tetanus and Botulinum Neurotoxin Type B In Vivo with a Cleavage-Specific Antibody
Source: MDPI journal article supplement (doi:10.3390/ijms23084355), 2022-04-14
Supplement: s1 [file s1]

```

VAMP-1_HUMAN      1 MSAPAQPPAE-GTEGTAPGGGPPGPPNMTSNRRLLQQTQAQVEEVVDIIRVNVDKVLERDQKL 62
VAMP-1_RAT        1 MSAPAQPPAE-GTEGAAPGGGPPGPPNMTSNRRLLQQTQAQVEEVVDIMRVNVDKVLERDQKL 62
VAMP-1_CHICKEN    1 MSEPAQQPAPGAPEGGAPAGGPPGPPNLSNRRLLQQTQAQVEEVVDIMRVNVDKVLERDQKL 63
VAMP-1_MOUSE      1 MSAPAQPPAE-GTEGAAPGGGPPGPPNMTSNRRLLQQTQAQVEEVVDIMRVNVDKVLERDQKL 62
VAMP-1_G.PIG      1 MSAPAQPPAE-GTEGAAPGGGPPGPPNMTSNRRLLQQTQAQVEEVVDIMRVNVDKVLERDQKL 62
VAMP-1_C.ELEGANS  1 -----MDAQGDAGAGGSGGGP---RPSNKRLLQQTQAQVEEVVGIMKVNVEKVLERDQKL 45
VAMP-1_XENOPUS    1 -----MSTPGTS-----ATGDPGNRRLLQQTQAQVEEVVDIMRVNVDKVLERDQKL 52
                  : . . . . . * : * * * * * : * * : * * : * * * * *

VAMP-1_HUMAN      63 SELDDRADALQAGASQFESSAAKLKRKYWWKNCKMMIMLGAICAIIVVVIVIFYFT- 118
VAMP-1_RAT        63 SELDDRADALQAGASVFESSAAKLKRKYWWKNCKMMIMLGAICAIIVVVIVIFYFT- 118
VAMP-1_CHICKEN    64 SELDDRADALQAGASVFESSAAKLKRKYWWKNCKMMIMMGVICAIVVVIVIFYFT- 119
VAMP-1_MOUSE      63 SELDDRADALQAGASQFESSAAKLKRKYWWKNCKMMIMLGAICAIIVVVIVIFYFT- 118
VAMP-1_G.PIG      63 SELDDRADALQAGASQFESSAAKLKRKYWWKNCKMMIMLGAICAIIVVVIVIFYFT- 118
VAMP-1_C.ELEGANS  46 SQDDRADALQAGASQFEKSAATLKRKYWWKNCKMMIMCAIVVILIIIIIVLWAGGK 109
VAMP-1_XENOPUS    53 SELDDRADALQAGASQFESSAAKLKRKYWWKNCKMMAILIIVLVIIIIIVWSVS- 118
                  * : * * * * * * * * * * * * * * * * * * * * * * * * * * * * *

VAMP-2_HUMAN      1 MSATAATAPPAAPAGEGGPPAPPPNLTSNRRLLQQTQAQVEEVVDIMRVNVDKVLERDQKL 60
VAMP-2_RAT        1 MSATAATVPPAAPAGEGGPPAPPPNLTSNRRLLQQTQAQVEEVVDIMRVNVDKVLERDQKL 60
VAMP-2_CHICKEN    1 MSAPAPTQGTST-G-AAGPPPATNVSSNKRLLQQTQAQVEEVVDIMRVNVDKVLERDQKL 58
VAMP-2_MOUSE      1 MSATAATVPPAAPAGEGGPPAPPPNLTSNRRLLQQTQAQVEEVVDIMRVNVDKVLERDQKL 60
VAMP-2_G.PIG      1 RSATAATAPPAAPAGEGGPPAPPPNLTSNRRLLQQTQAQVEEVVDIMRVNVDKVLERDQKL 60
VAMP-2_DROSOPHILA 1 ----MSAPAGAPAEPPGNGAPP-NLTSNRRLLQQTQAQVEEVVDIMRVNVDKVLERDQKL 60
VAMP-2_XENOPUS    1 --MSAPAGPPAAAPGDGAPGPPNLTSNRRLLQQTQAQVEEVVDIMRVNVDKVLERDQKL 60
                  : . . * . * * * * * * * * * * * * * * * * *

VAMP-2_HUMAN      61 SELDDRADALQAGASQFESSAAKLKRKYWWKNLKMIIILGVICAILIIIIIVFYST 116
VAMP-2_RAT        61 SELDDRADALQAGASQFESSAAKLKRKYWWKNLKMIIILGVICAILIIIIIVFYST 116
VAMP-2_CHICKEN    59 SELNDRADALQAGASQFESSAAKLKRKYWWKNCKMMIILGVVCTVILIIIIIVFYST 114
VAMP-2_MOUSE      61 SELDDRADALQAGASQFESSAAKLKRKYWWKNLKMIIILGVICAILIIIIIVFYST 116
VAMP-2_G.PIG      61 SELDDRADALQAGASQFESSAAKLKRKYWWKNLKMIIILGVICAILIIIIIVFYST 116
VAMP-2_DROSOPHILA 55 SELDDRADALQAGASQFESSAAKLKNKYWWKNLKMIIILGVICIVILIIIIIVFYST 111
VAMP-2_XENOPUS    59 SELDDRADALQAGASQFESSAAKLKRKYWWKNLKMIIIMGVICAILIIIIIVFYST 114
                  * * * : * * * * * * * * * * * * * * * * * * * * * * *

```

**Supplementary Figure S1.** Alignment of VAMP-1 (top) and VAMP-2 showing that the two proteins are highly conserved FETSAAKLKRKYW peptide (pink) generated by BoNT/B and TeNT is present in all the main animal species used in research. C) Scheme showing the generation of the immunogenic carrier by chemical conjugation of the C-terminal Cysteine to the Keyhole limpet Hemocyanin. D) the peptide-KLH complex was injected into a rabbit and at the scheduled time points the blood was collected for the ensuing purification of peptide-specific IgGs.

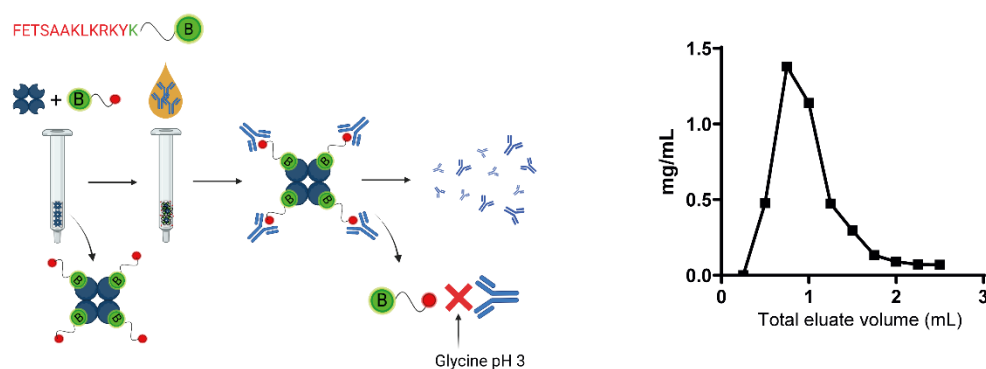

**Supplementary Figure S2.** Purification strategy of the VAMP<sub>77</sub> polyclonal antibody. The left panel shows the antigenic peptide conjugated to a biotin residue for the fast coupling to the streptavidin-agarose resin. The streptavidin-peptide complex was then packed inside disposable columns and the immune serum was incubated overnight for antigen binding. Antibodies were then eluted with sequential additions of Glycine solution at pH 3, which induces the release of bound IgG without affecting the biotin-streptavidin interaction. On the right is reported the chromatogram of the IgG fractions obtained during the elution.

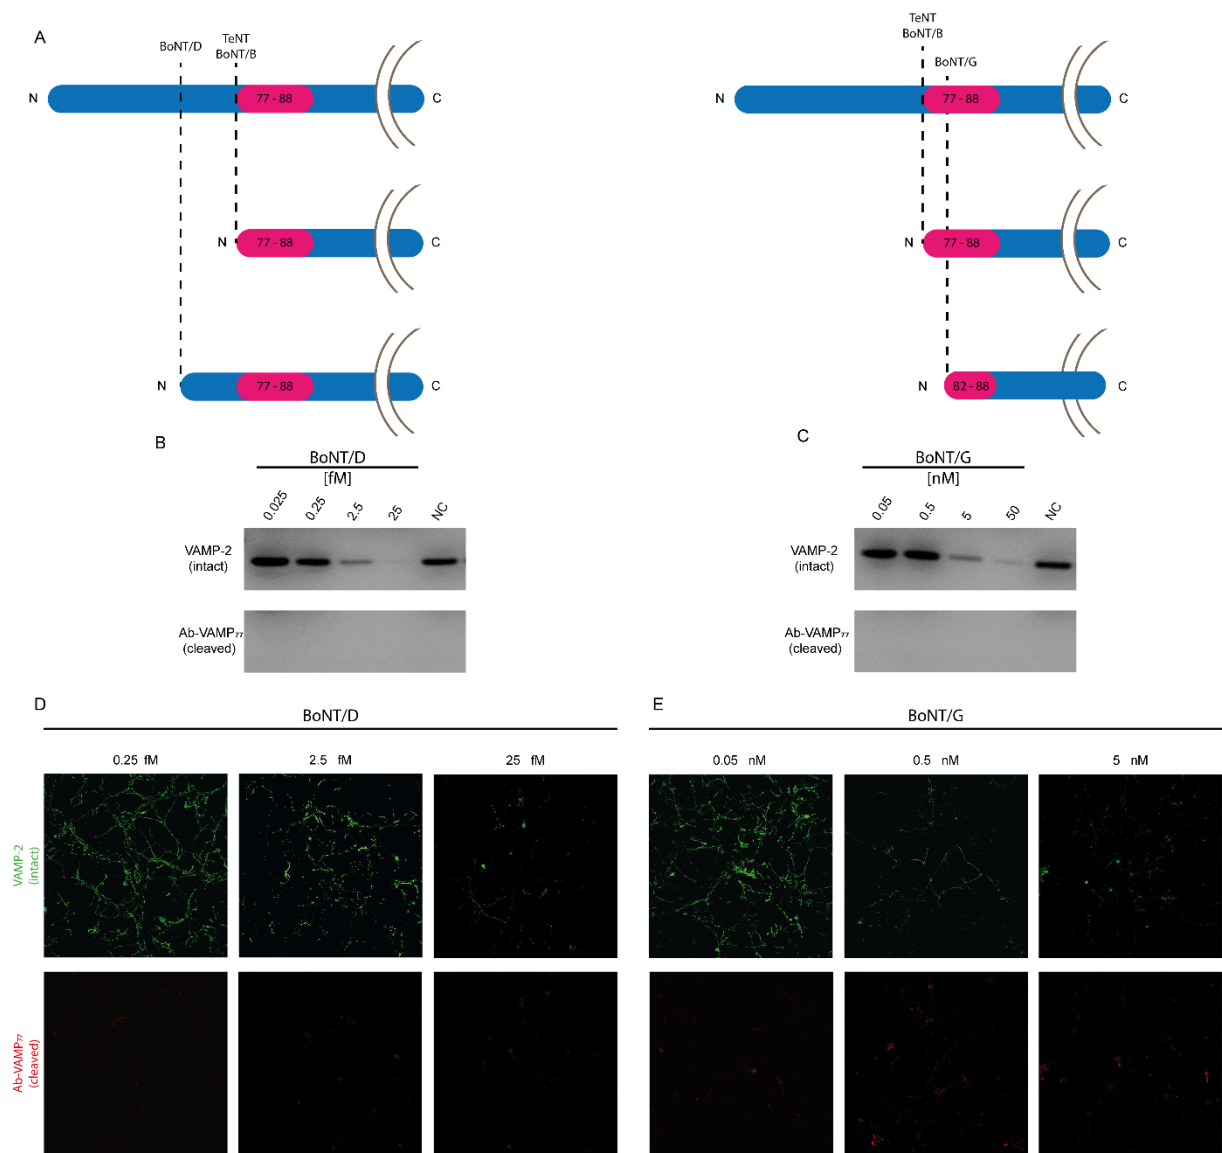

**Supplementary Figure S3.** A) Scheme showing the different fragments generated in VAMP-2 after the cleavage by BoNT/D, TeNT, BoNT/B, and BoNT/G, highlighting the sequence corresponding to the antigenic peptide used to generate the VAMP<sub>77</sub> antibody. B) and C) Representative western blotting showing that the VAMP<sub>77</sub> antibody does not recognize VAMP truncated by BoNT/D and BoNT/G in CGNs treated with the indicated concentrations of toxins. The NC samples are control neurons not treated with any toxin. C) and D) show the same experiment evaluated by imaging using the same antibodies.

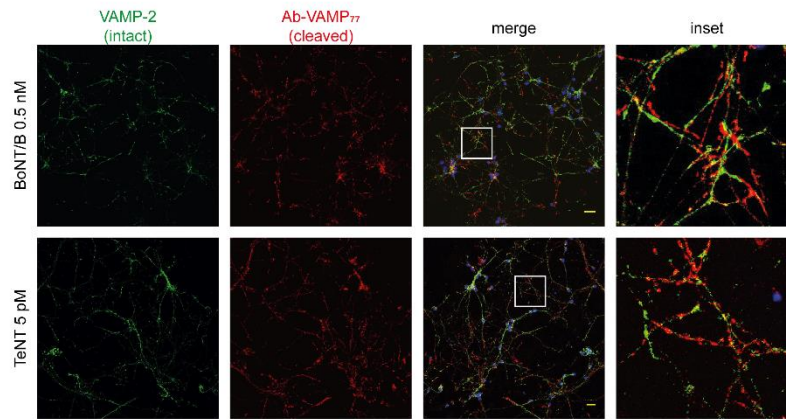

**Supplementary Figure S4.** Immunofluorescence analysis shows that in CGNs treated with TeNT and BoNT/B at the indicated concentrations, the antibody against VAMP-2 and the VAMP77 monoclonal antibody do recognize two different populations of VAMP, i.e., the intact and the cleaved form.

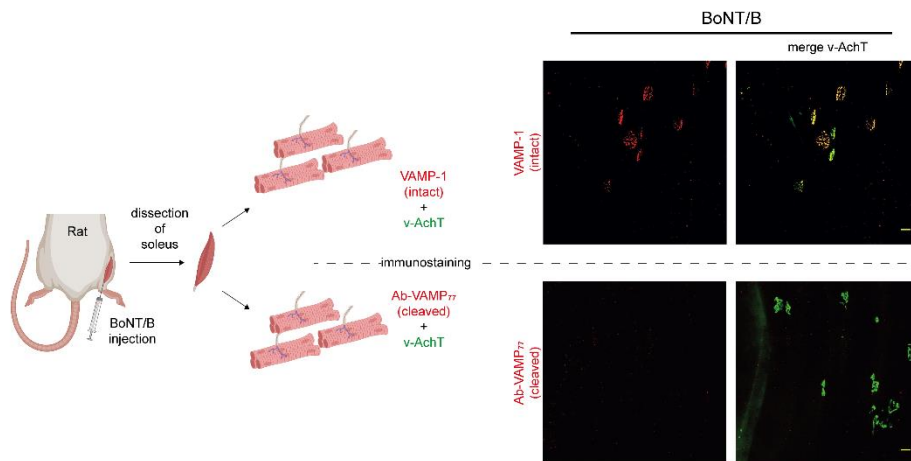

**Supplementary Figure S5.** BoNT/B does not cleave VAMP at the NMJ of the rat. A) Scheme showing the injection of BoNT/B in the rat hind limb. After 48 hours, the soleus muscle was dissected and fixed. Muscle bundles of about 20-30 myofibers were then stained with an antibody either against intact VAMP-1 (red in top panels) or with the VAMP77 antibody (red in bottom panels) to assess VAMP cleavage. In both conditions, the muscle was stained with an antibody against the v-AchT to spot the NMJs.
